# Supplementary material for: Technical note: Facilitating the use of low-cost methane (CH 4 )sensors in flux chambers – calibration, data processing, and an opensource make-it-yourself logger
Source: Copernicus journal article supplement (doi:10.5194/bg-2019-499), 2020-01-20
Supplement: Supplementary file [file bg-2019-499-AC1-supplement.pdf]

## Response to comments by Referee #1

Referee comments are provided in grey and author responses in *blue italic style text*.

In this paper Bastviken and colleagues present details on a low cost sensor for measuring CH<sub>4</sub> fluxes in chambers. They also describe a low-cost open source logger. There is a growing interest in development and use of low cost sensors for measuring key biogeochemical processes, and this paper describes a useful new sensor to add to the growing list. The paper is focused on calibration and data processing using this new sensor setup.

One thing that I would have liked to have seen was some real world data using the system - that is a demonstration of field based flux measurements. It is under field conditions where the utility of the sensor needs to be proved. In saying this, I think the paper as it stands is publishable and will make a useful contribution to the scientific literature. The detailed calibration experiments will be extremely useful for the community working on developing similar systems. look forward to seeing "real-world" data collected by the sensor system in the future.

*We thank Referee #1 for all work and are glad that our work is considered valuable and important. We will provide examples of real field based measurements in the revised manuscript.*
